# Supplementary material
Source: Preprints.org preprint supplement (doi:10.20944/preprints202107.0097.v1)
Supplement: Supplementary file 2 [file supplementary]

Supplementary Table 1. Comparison of lean, nonlean, NAFLD, and non-NAFLD groups in metabolic variables using Tukey’s post hoc analysis.

| lean/NAFLD: | +/-vs+/+ | +/-vs-/- | +/-vs-/+ | +/+vs-/- | +/+vs-/+ | -/-vs-/+ |
| --- | --- | --- | --- | --- | --- | --- |
| Age (years) | 0.663 | 0.199 | 0.079 | 0.754 | 0.856 | 0.966 |
| Male (%) | 0.059 | 0.002 | <0.001 | 0.400 | <0.001 | 0.451 |
| BMI(kg/m2) | 0.001. | <0.001 | <0.001 | <0.001 | <0.001 | <0.001 |
| WC (cm) | <0.001 | <0.001 | <0.001 | <0.001 | <0.001 | <0.001 |
| Body fat (%) | 0.610 | <0.001 | <0.001 | 0.024 | <0.001 | 0.122 |
| Systolic BP | 0.007 | 0.019 | <0.001 | 0.977 | <0.001 | 0.006 |
| Diastolic BP | 0.007 | 0.022 | <0.001 | 0.986 | 0.002 | 0.075 |
| TCHO (mmol/L) | 0.339 | 0.822 | 0.003 | 0.980 | 0.658 | 0.553 |
| TG (mmol/L) | 0.001 | 0.321 | <0.001 | 0.711 | <0.001 | <0.001 |
| HDL-C(mmol/L) | <0.001 | 0.003 | <0.001 | 0.745 | <0.001 | <0.001 |
| LDL-C(mmol/L) | 0.023 | 0.315 | <0.001 | 0.971 | 0.359 | 0.296 |
| Glucose(mmol/L) | 0.833 | 0.5448 | <0.001 | 0.928 | <0.001 | 0.024 |
| Insulin(U/mL) | 0.303 | 0.352 | <0.001 | 0.994 | <0.001 | <0.001 |
| HOMA-IR | 0.303 | 0.324 | <0.001 | 0.990 | <0.001 | <0.001 |
| GOT | 0.499 | 0.767 | <0.001 | 1.000 | <0.001 | 0.003 |
| GPT | 0.017 | 0.463 | <0.001 | 0.876 | <0.001 | <0.001 |
| CRP (mg/dL) | 0.961 | 0.439 | <0.001 | 0.321 | <0.001 | 0.672 |
| Fetuin-A (mg/L) | 0.030 | 0.413 | 0.019 | 0.951 | 0.981 | 0.991 |

Four groups: lean (+) NAFLD (-), lean (+) NAFLD (+), lean (-) NAFLD (-), and lean (-) NAFLD (+)
